# Supplementary material
Source: publisher site journal article supplement (https://www.dovepress.com/article/530585)
Supplement: Supplementary file 1 [file 503585%20Supplementary%20Material.docx]

**Supplementary Table 1** Demographic and clinical characteristics of neonates with *E. coli* and *K. pneumonia* bloodstream infections

| Factors |  | Case(n) | Constituent ratio(%) |
| --- | --- | --- | --- |
| **Basic data** |  |  |  |
| Gender |  |  |  |
|  | Male | 74 | 53.2 |
|  | Female | 65 | 46.8 |
| Gestational Age |  |  |  |
|  | Term infant | 70 | 50.4 |
|  | Late premature infant | 56 | 40.3 |
|  | Very premature infants | 13 | 9.3 |
| Weight |  |  |  |
|  | Normal birth weight | 68 | 48.9 |
|  | Low birth weight | 34 | 24.4 |
|  | Very low birth weight | 25 | 17.8 |
|  | Extremely low birth weight | 11 | 7.9 |
| Type of bloodstream infection |  |  |  |
|  | Early-Onset infection | 47 | 33.8 |
|  | Late-Onset infection | 92 | 66.2 |
| Cesarean section |  | 55 | 39.5 |
| Premature rupture of membrane |  | 62 | 44.6 |
| breast-fed |  | 98 | 70.5 |
| **Underlying diseases** |  |  |  |
|  | Pneumonia | 23 | 16.5 |
|  | Enteritis | 9 | 6.4 |
|  | Neonatal meningitis | 9 | 6.4 |
|  | Hypoalbuminemia | 50 | 35.9 |
|  | Anemia | 43 | 30.9 |
| **Invasive procedures and devices** |  |  |  |
|  | Mechanical ventilation | 74 | 53.2 |
|  | Indwelling catheters | 7 | 5 |
|  | Central venous catheterization | 10 | 7.1 |
| **Antibiotic exposure** |  |  |  |
|  | Penicillins | 8 | 5.7 |
|  | Cephalosporins | 11 | 7.9 |
|  | Carbapenem antibiotic | 17 | 12.2 |
|  | β-lactam-β-lactamase inhibitors | 44 | 31.6 |
| **Microorganism** |  |  |  |
|  | ESBL | 42 | 30.1 |
|  | ESBL-EC | 29 | 20.8 |
|  | ESBL-KP | 13 | 9.3 |
|  | CRKP | 10 | 7.1 |
| **Outcomes** |  |  |  |
|  | Good outcome | 113 | 81.3 |
|  | Poor outcome | 26 | 18.7 |
| Abbreviations:ESBL-KP, extended-spectrum β-lactamase *klebsiella pneumonia*; ESBL-EC, extended-spectrum β-lactamase *escherichia coli*; CRKP, carbapenem-resistant *klebsiella pneumonia* | | | |
